# Supplementary material for: Concise catalytic asymmetric total syntheses of ancistrocladinium A and its atropdiastereomer
Source: Royal Society of Chemistry journal article supplement (doi:10.1039/c7qo00195a), 2017-01-01
Supplement: c7qo00195a1.pdf [file c7qo00195a1.pdf]

# Concise Catalytic Asymmetric Total Syntheses of Ancistrocladinium A and Its Atropdiastereomer

Kyung-Hee Kim and Cheol-Hong Cheon\*

*Department of Chemistry, Korea University, 145 Anam-ro, Seungbuk-gu, Seoul 02841, Republic of Korea*

# 1. Spectroscopic Data

## 1-1. Spectroscopic Data of 3

### a) <sup>1</sup>H NMR Spectrum of 3

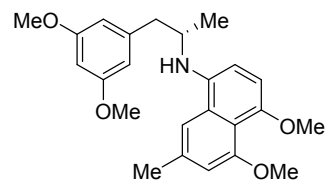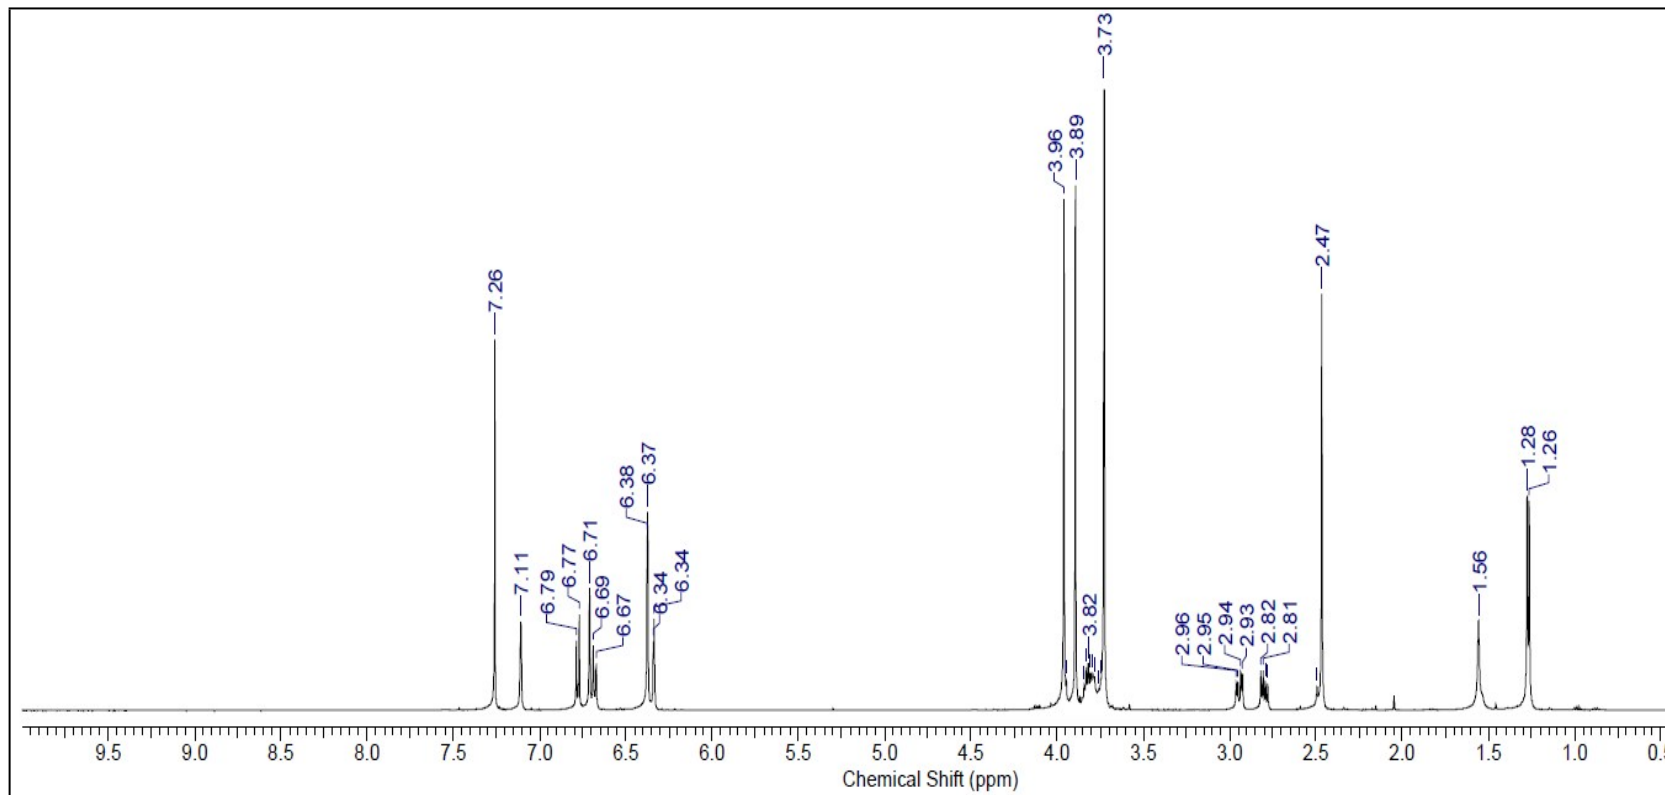

b)  $^{13}\text{C}$  NMR Spectrum of 3

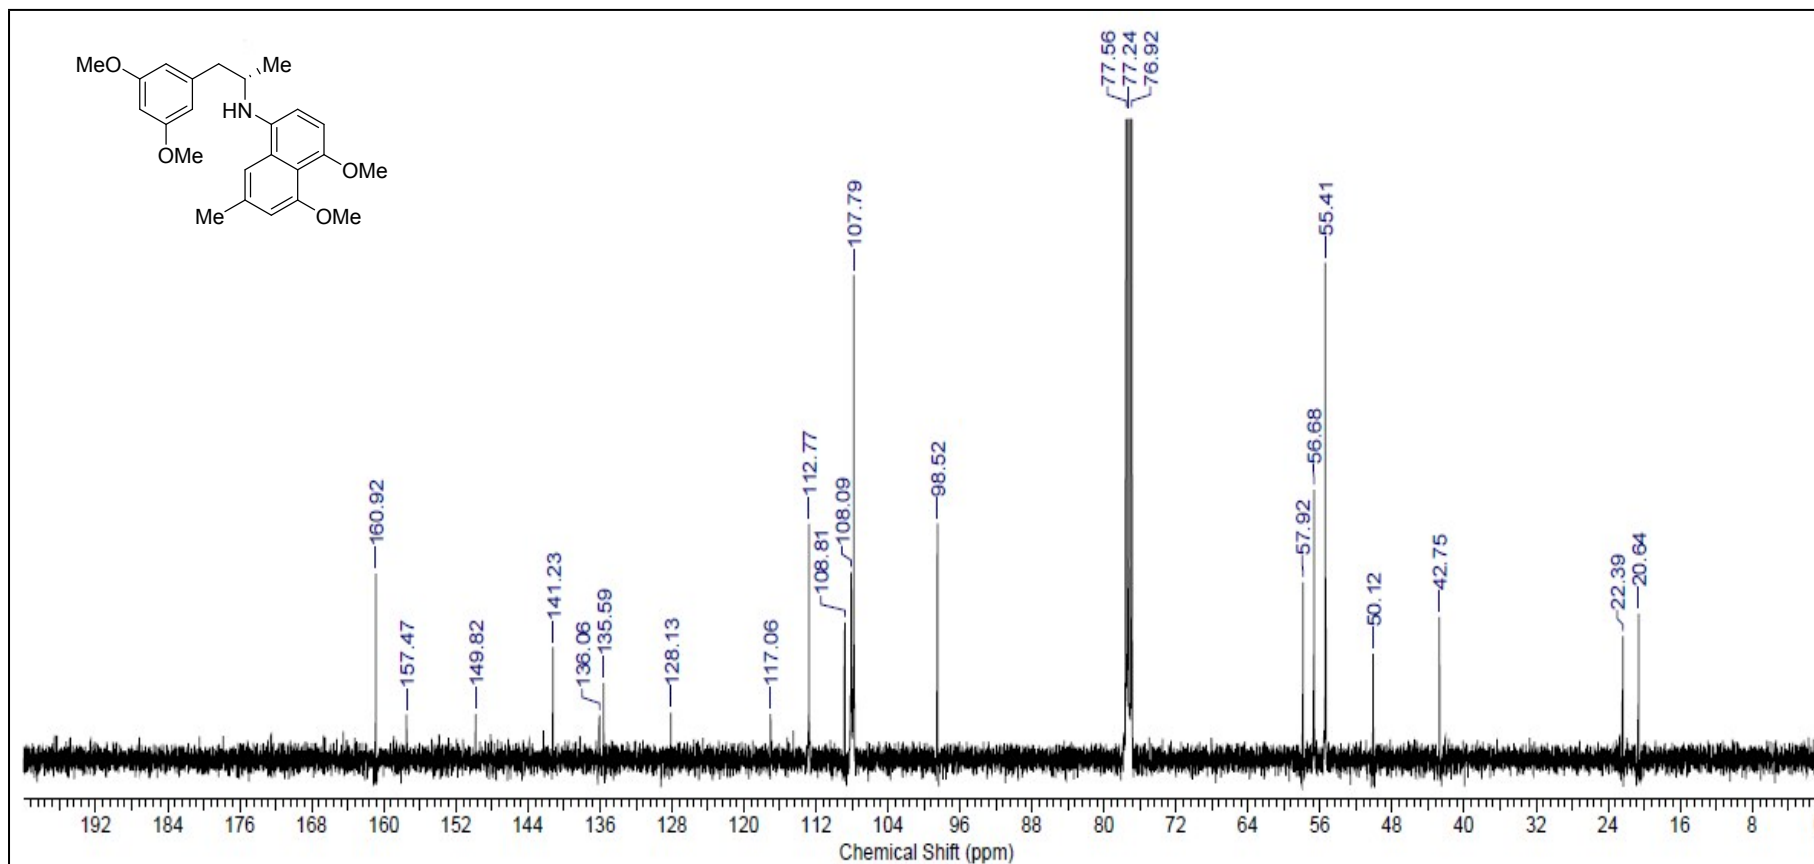

c) HPLC data of 3

*rac*-3

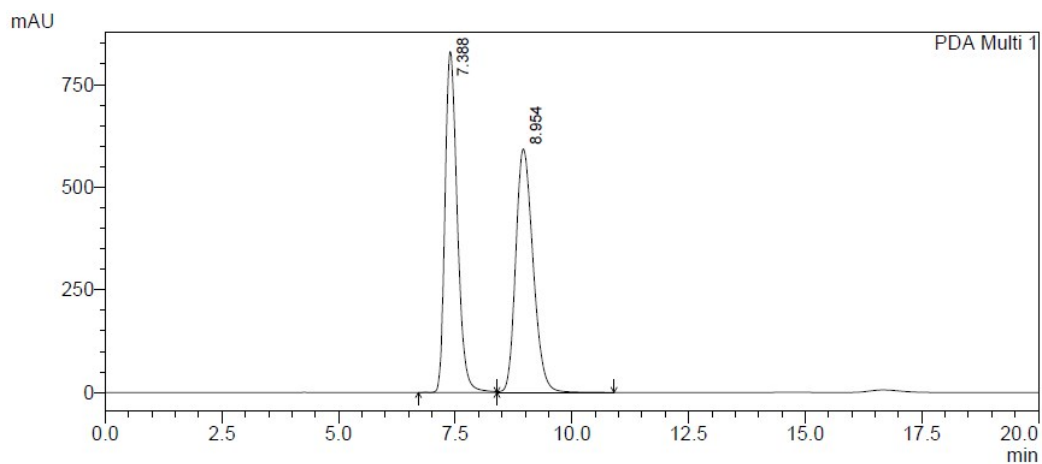

PeakTable

PDA Ch1 339nm 4nm

| Peak# | Ret. Time | Area     | Height  | Area %  | Height % |
|-------|-----------|----------|---------|---------|----------|
| 1     | 7.388     | 15192172 | 830370  | 49.725  | 58.325   |
| 2     | 8.954     | 15359986 | 593326  | 50.275  | 41.675   |
| Total |           | 30552158 | 1423696 | 100.000 | 100.000  |

(S)-3

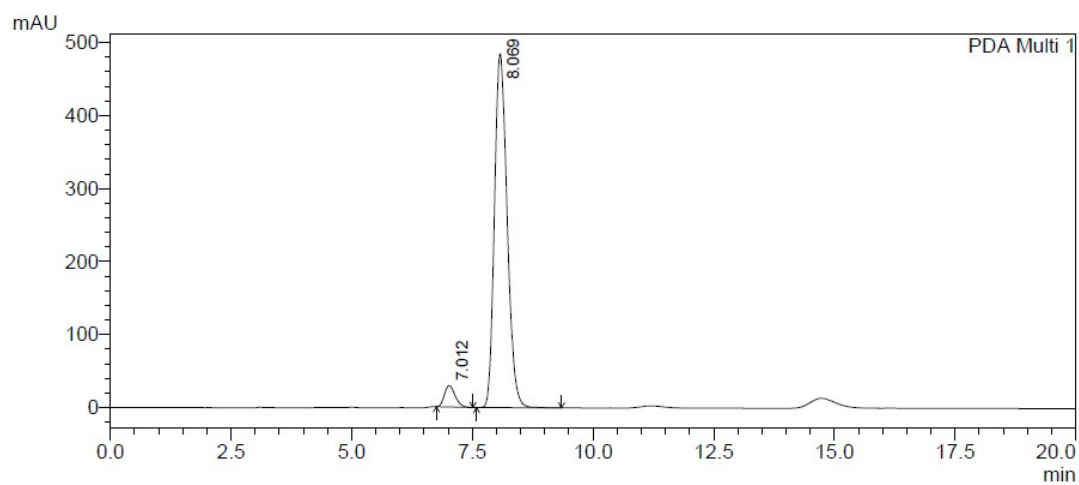

PeakTable

PDA Ch1 339nm 4nm

| Peak# | Ret. Time | Area    | Height | Area %  | Height % |
|-------|-----------|---------|--------|---------|----------|
| 1     | 7.012     | 453071  | 29529  | 4.859   | 5.739    |
| 2     | 8.069     | 8871156 | 484963 | 95.141  | 94.261   |
| Total |           | 9324227 | 514492 | 100.000 | 100.000  |

## 1-2. Spectroscopic Data of *M-2*

### a) $^1\text{H}$ NMR Spectrum of *M-2*

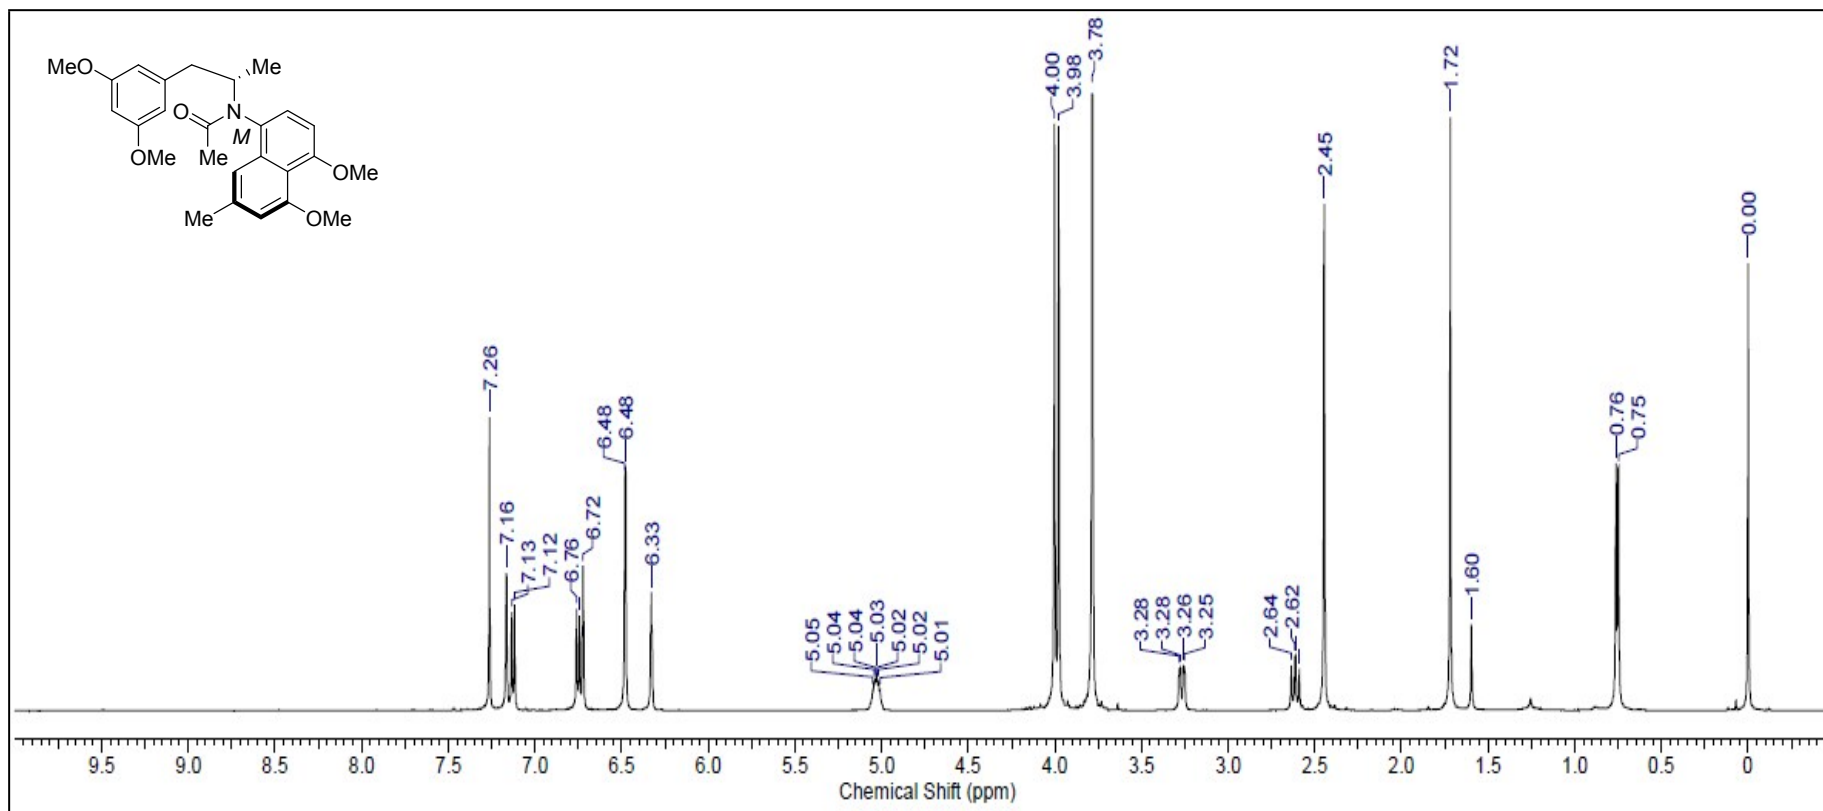

b) <sup>13</sup>C NMR Spectrum of M-2

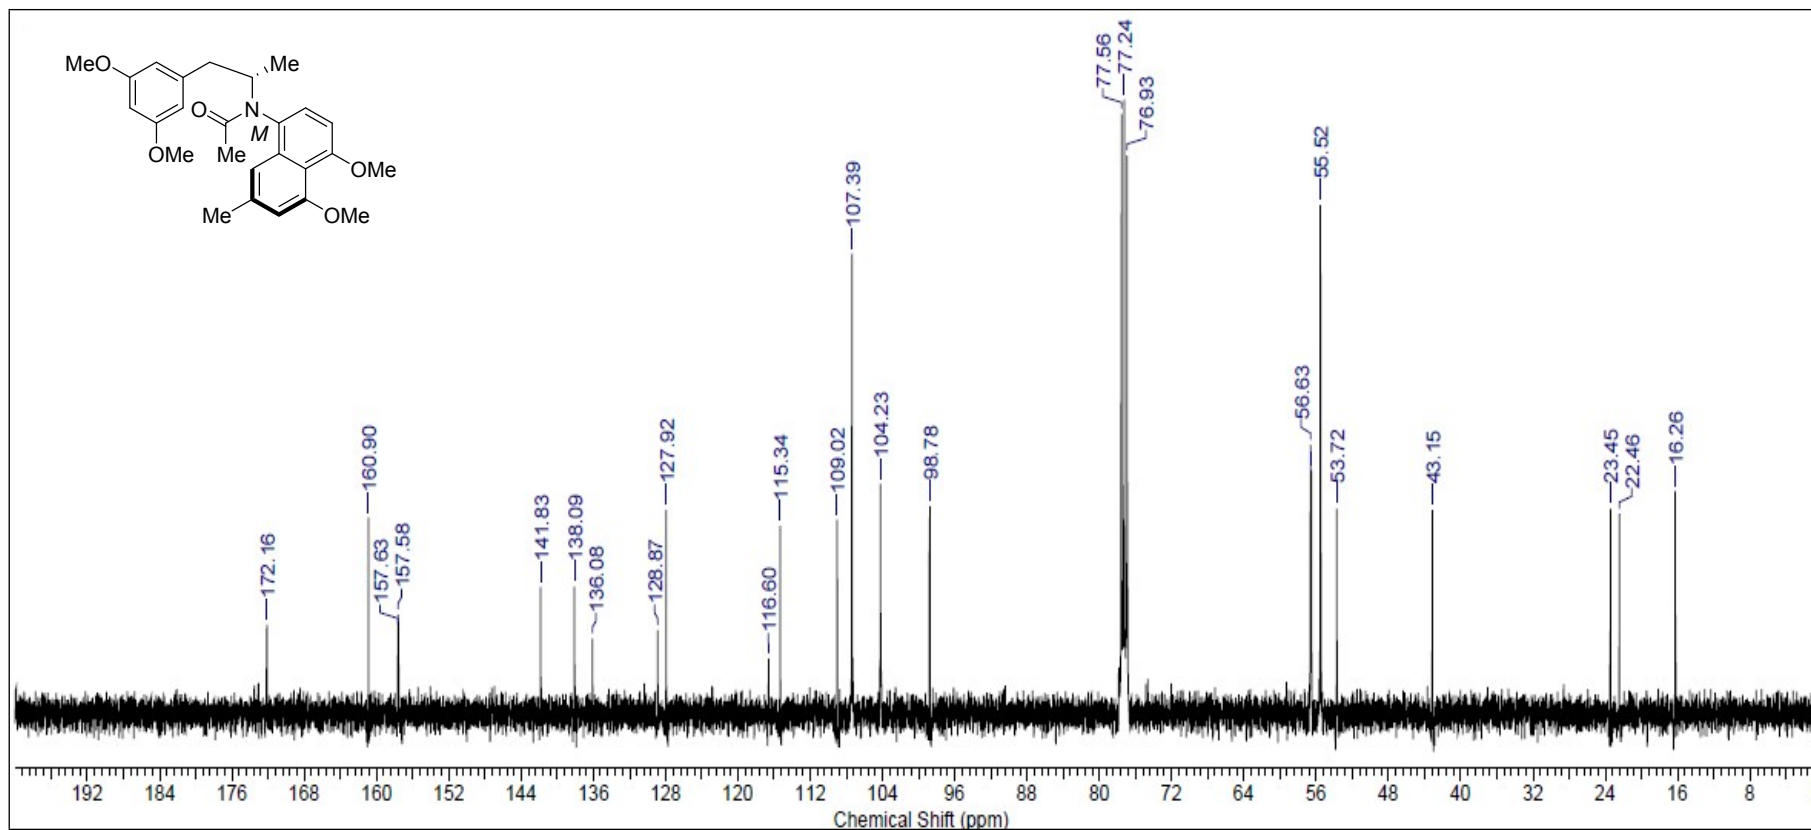

c) HPLC data of *M-2*

*rac-M-2*

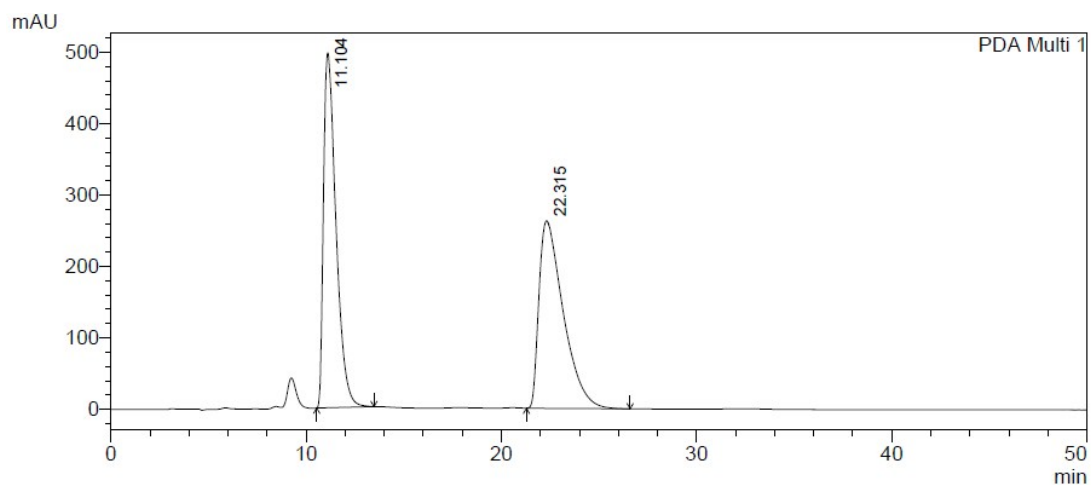

PeakTable

| PDA Ch1 339nm 4nm |           |          |        |         |          |
|-------------------|-----------|----------|--------|---------|----------|
| Peak#             | Ret. Time | Area     | Height | Area %  | Height % |
| 1                 | 11.104    | 22049832 | 496935 | 49.289  | 65.425   |
| 2                 | 22.315    | 22685980 | 262616 | 50.711  | 34.575   |
| Total             |           | 44735813 | 759551 | 100.000 | 100.000  |

*(S)-M-2*

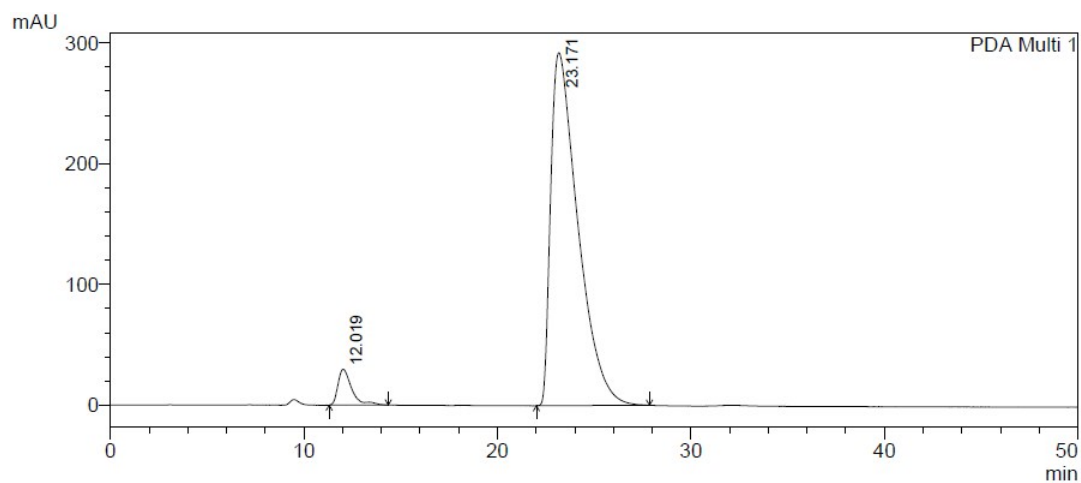

PeakTable

| PDA Ch1 339nm 4nm |           |          |        |         |          |
|-------------------|-----------|----------|--------|---------|----------|
| Peak#             | Ret. Time | Area     | Height | Area %  | Height % |
| 1                 | 12.019    | 1464137  | 29684  | 4.881   | 9.215    |
| 2                 | 23.171    | 28532022 | 292447 | 95.119  | 90.785   |
| Total             |           | 29996158 | 322130 | 100.000 | 100.000  |

### 1-3. Spectroscopic Data of *P-2*

#### a) $^1\text{H}$ NMR Spectrum of *P-2*

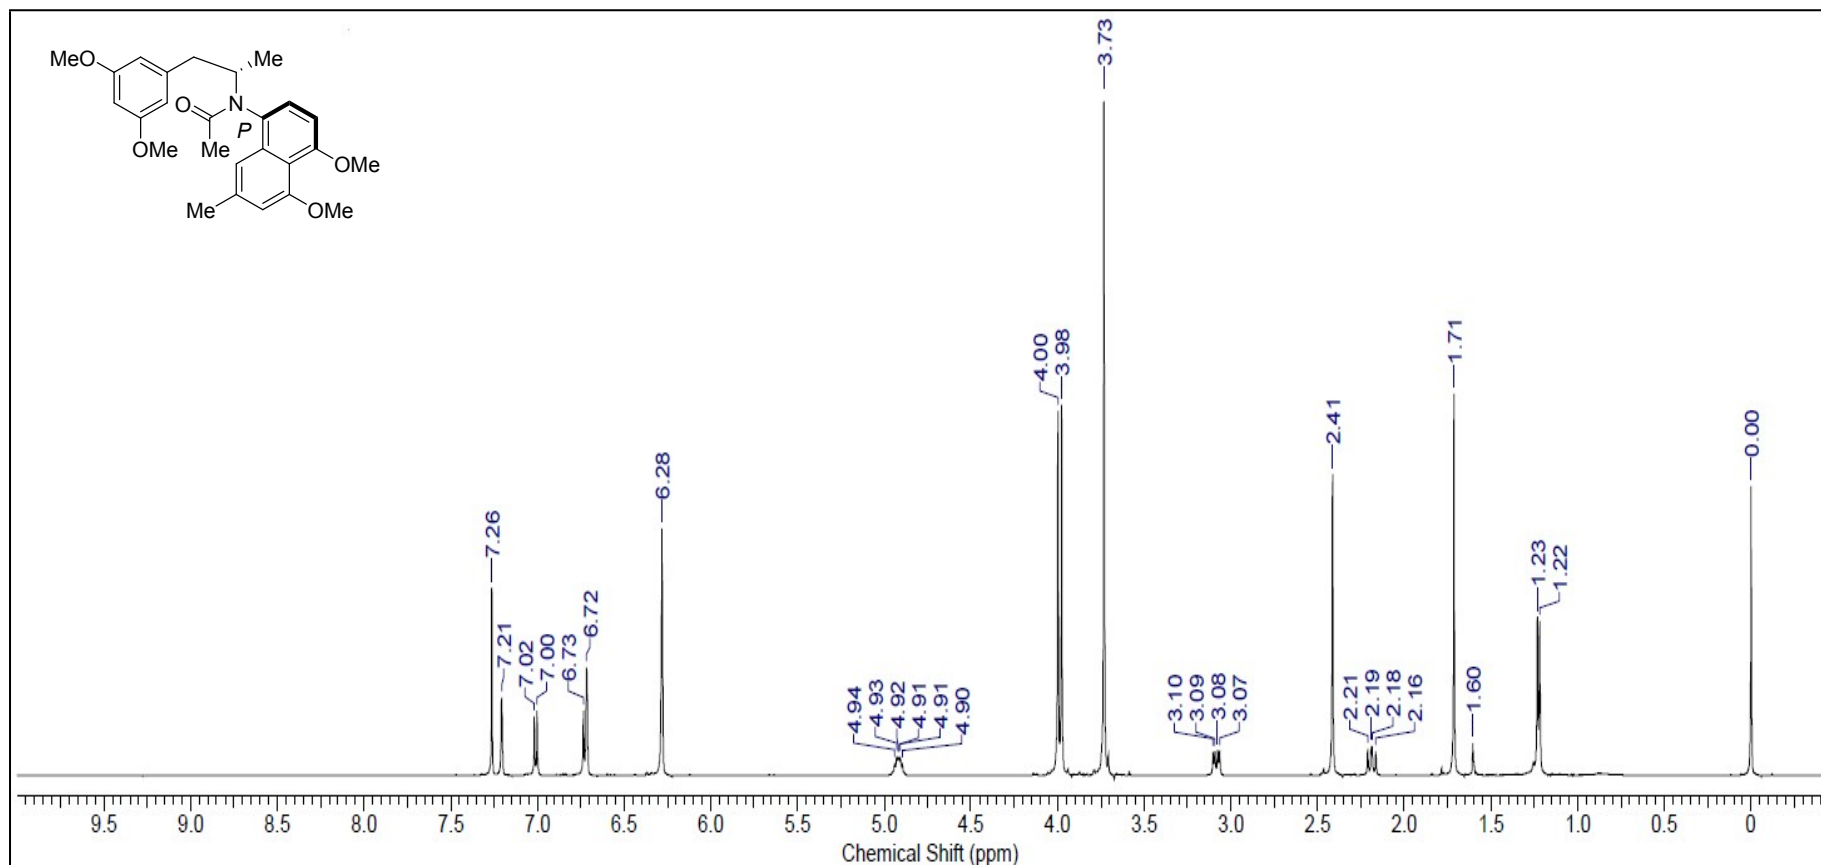



b) <sup>13</sup>C NMR Spectrum of P-2

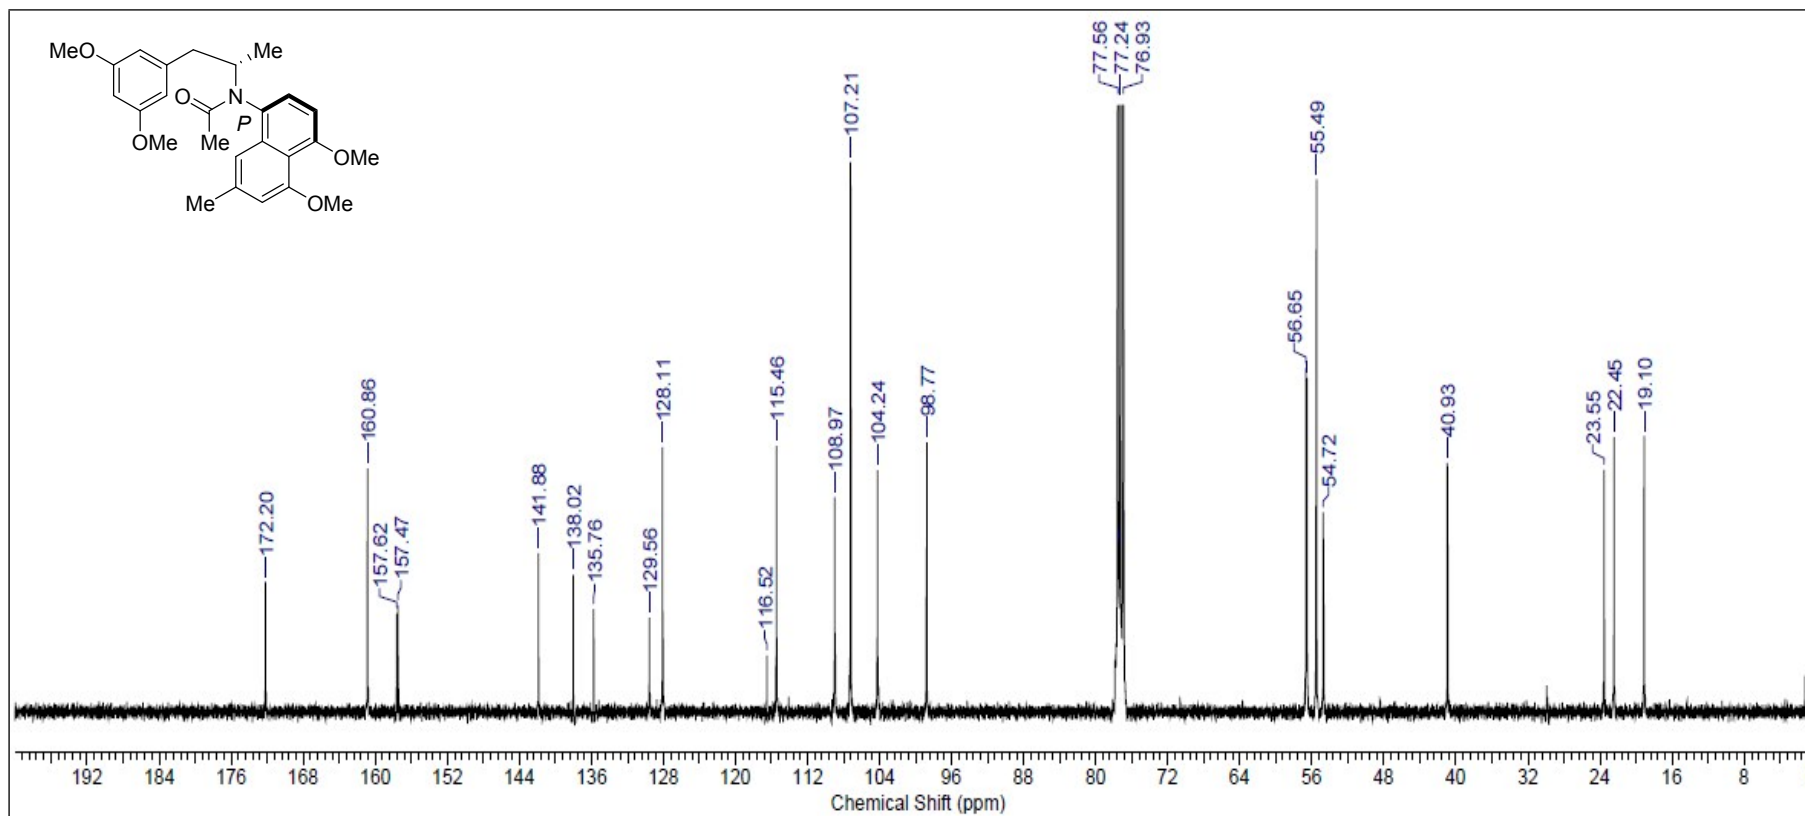

c) HPLC data of *P-2*

*rac-P-2*

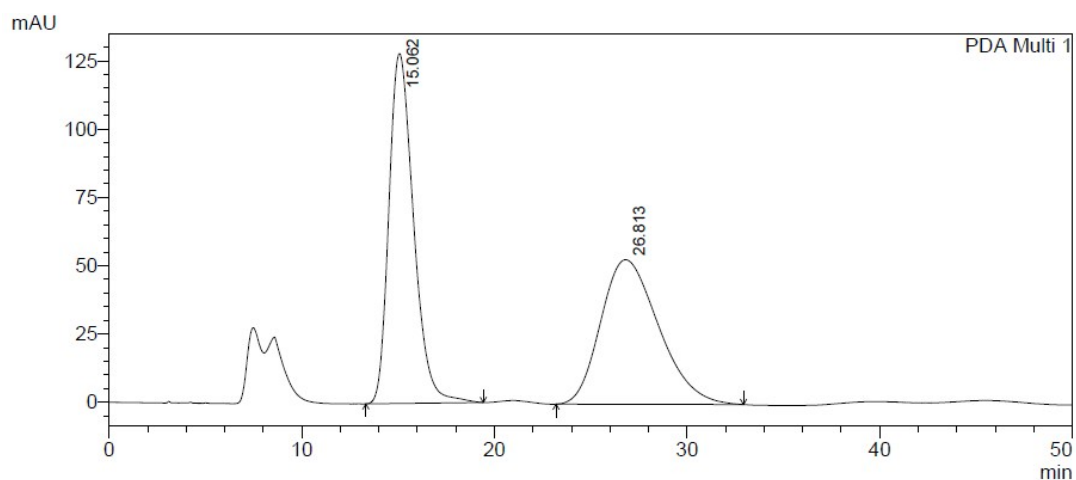

PeakTable

PDA Ch1 339nm 4nm

| Peak# | Ret. Time | Area     | Height | Area %  | Height % |
|-------|-----------|----------|--------|---------|----------|
| 1     | 15.062    | 11411356 | 128168 | 50.739  | 70.759   |
| 2     | 26.813    | 11078788 | 52965  | 49.261  | 29.241   |
| Total |           | 22490144 | 181133 | 100.000 | 100.000  |

*(S)-P-2*

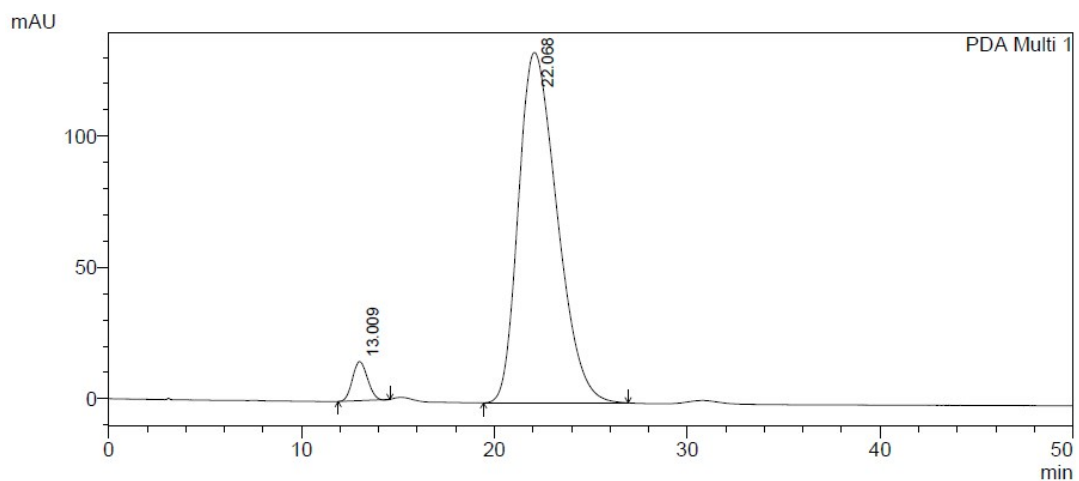

PeakTable

PDA Ch1 339nm 4nm

| Peak# | Ret. Time | Area     | Height | Area %  | Height % |
|-------|-----------|----------|--------|---------|----------|
| 1     | 13.009    | 802492   | 14885  | 4.133   | 10.034   |
| 2     | 22.068    | 18613687 | 133460 | 95.867  | 89.966   |
| Total |           | 19416179 | 148344 | 100.000 | 100.000  |

### 1-4. Spectroscopic Data of Ancistrocladinium A (*M-1*)

a) <sup>1</sup>H NMR Spectrum of *M-1* (solvent; CDCl<sub>3</sub>)

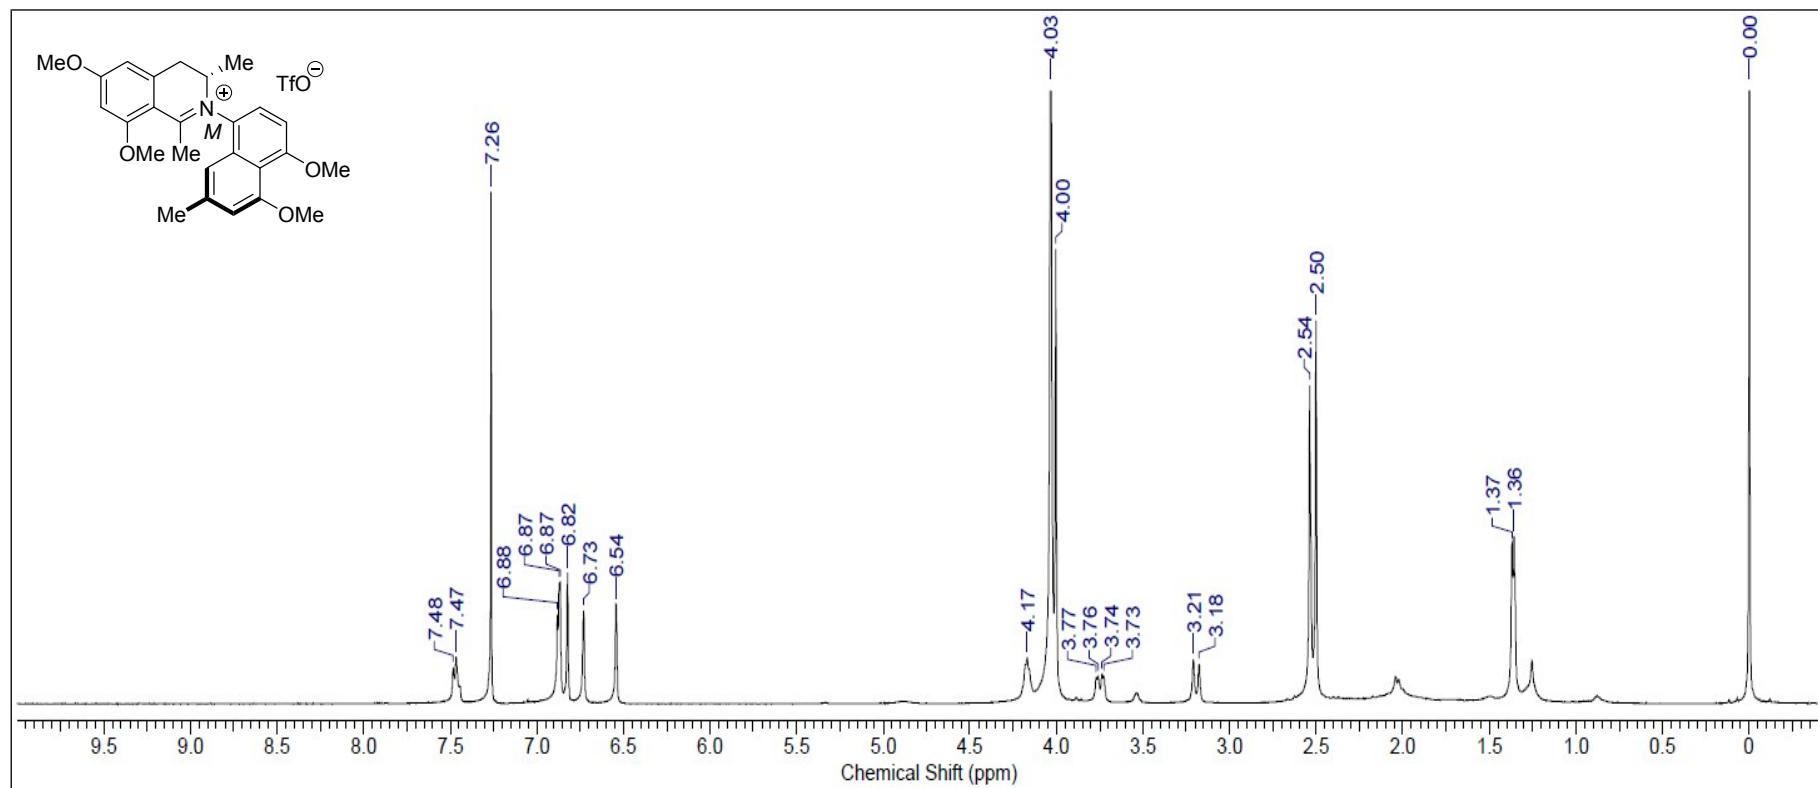

b) <sup>1</sup>H NMR Spectrum of *M*-1 (solvent; CD<sub>3</sub>OD)

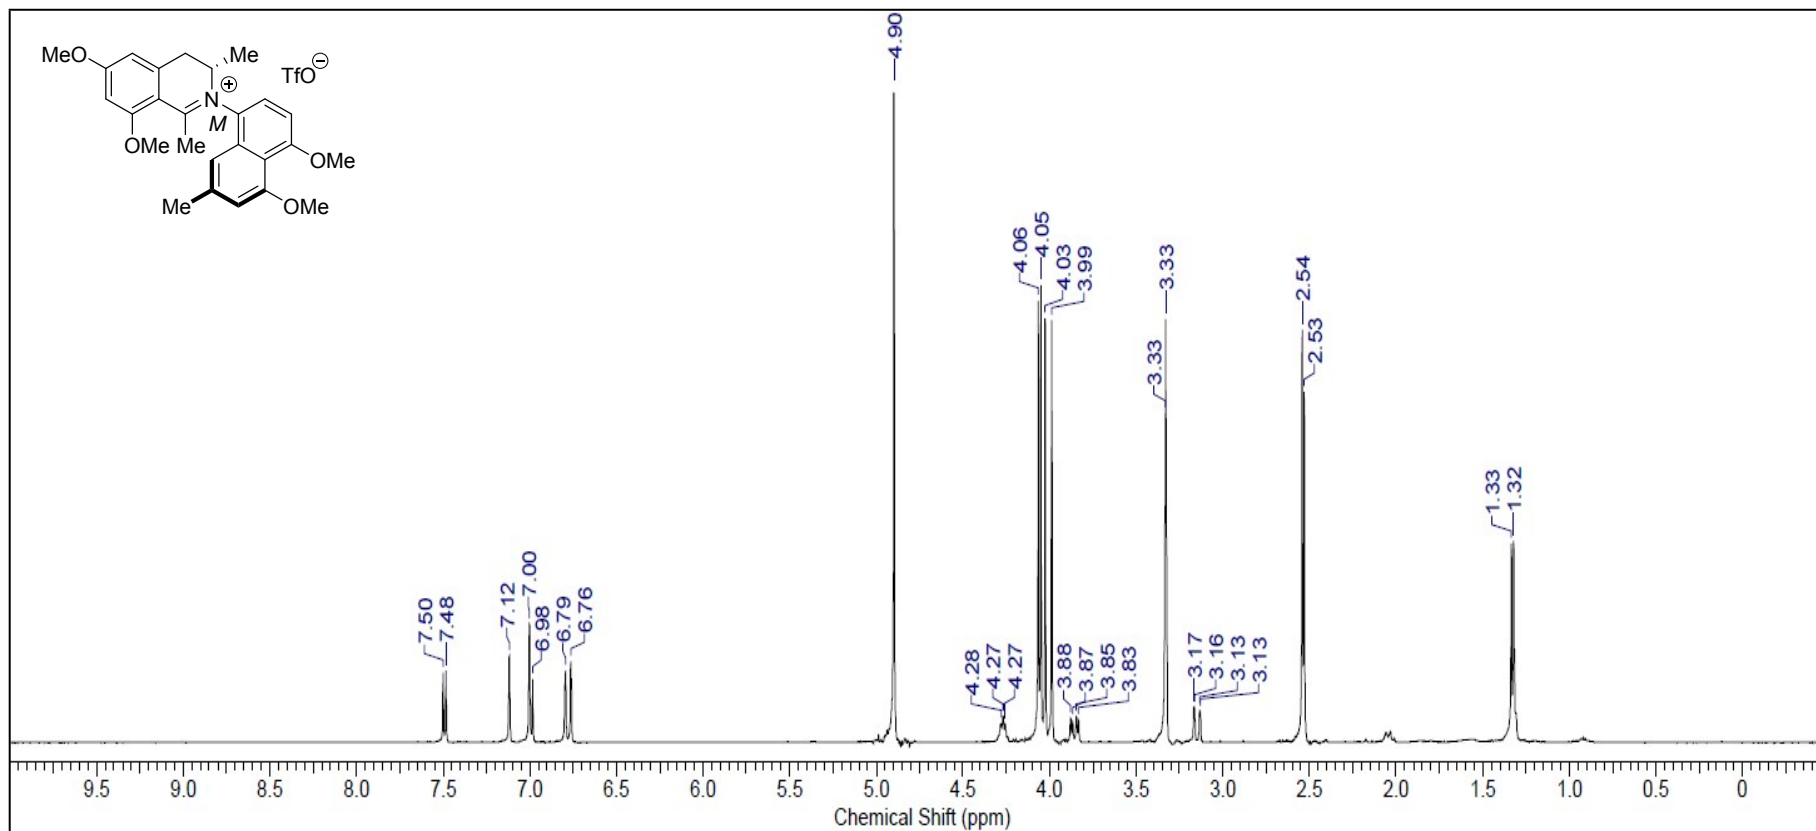

c) <sup>13</sup>C NMR Spectrum of *M*-1 (solvent; CDCl<sub>3</sub>)

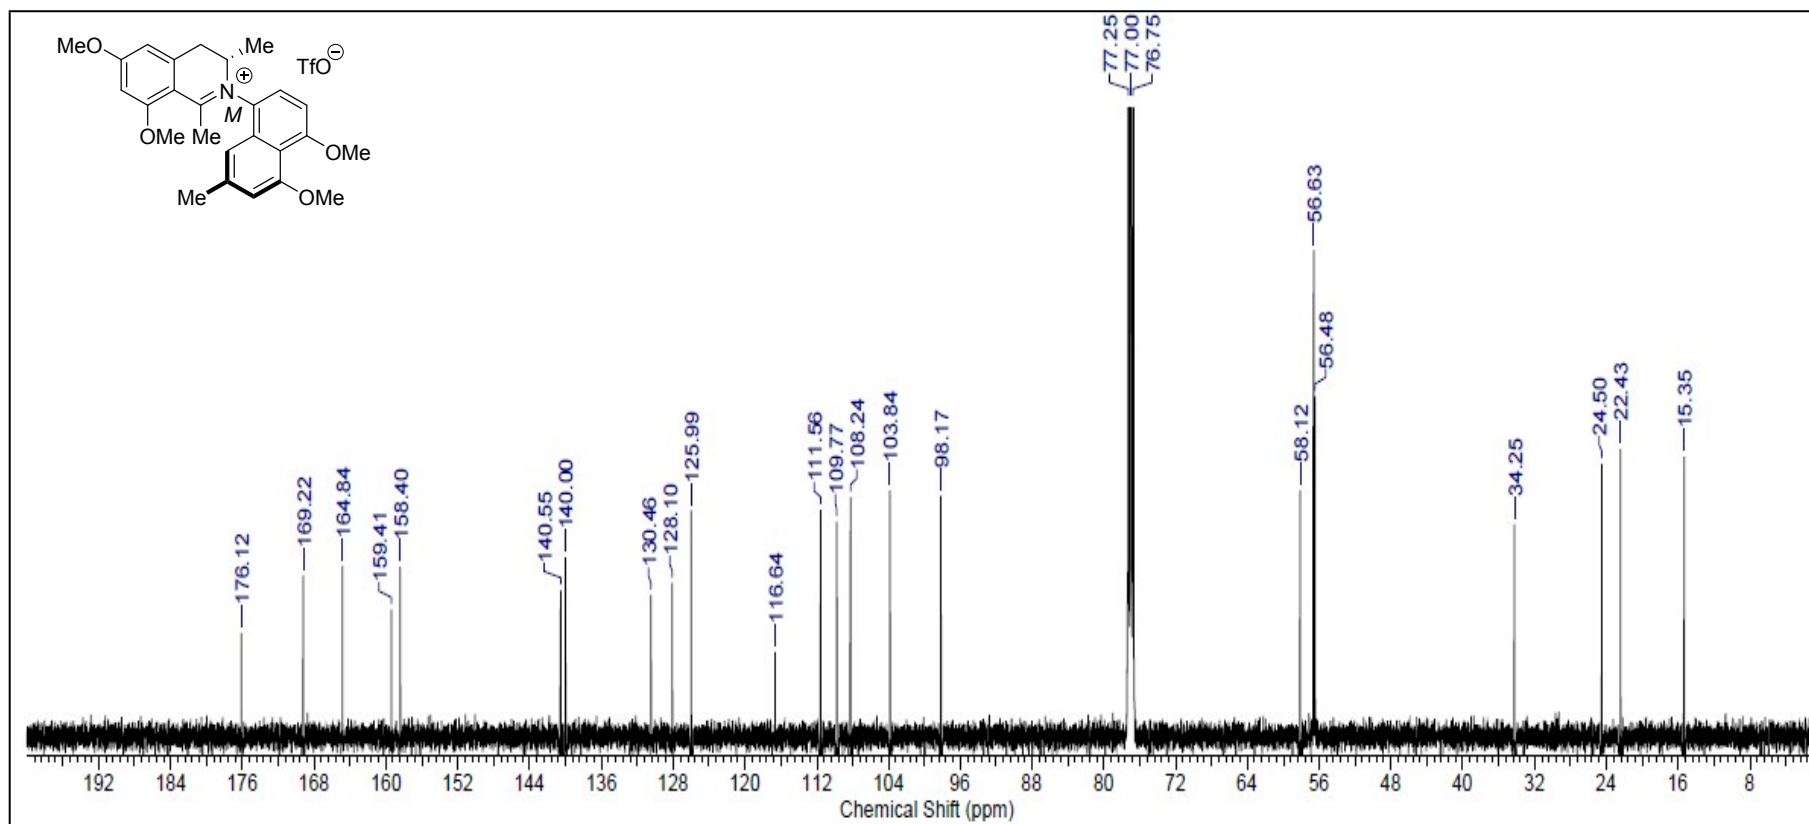

d)  $^{19}\text{F}$  NMR Spectrum of *M*-1 (solvent;  $\text{CD}_3\text{OD}$ )

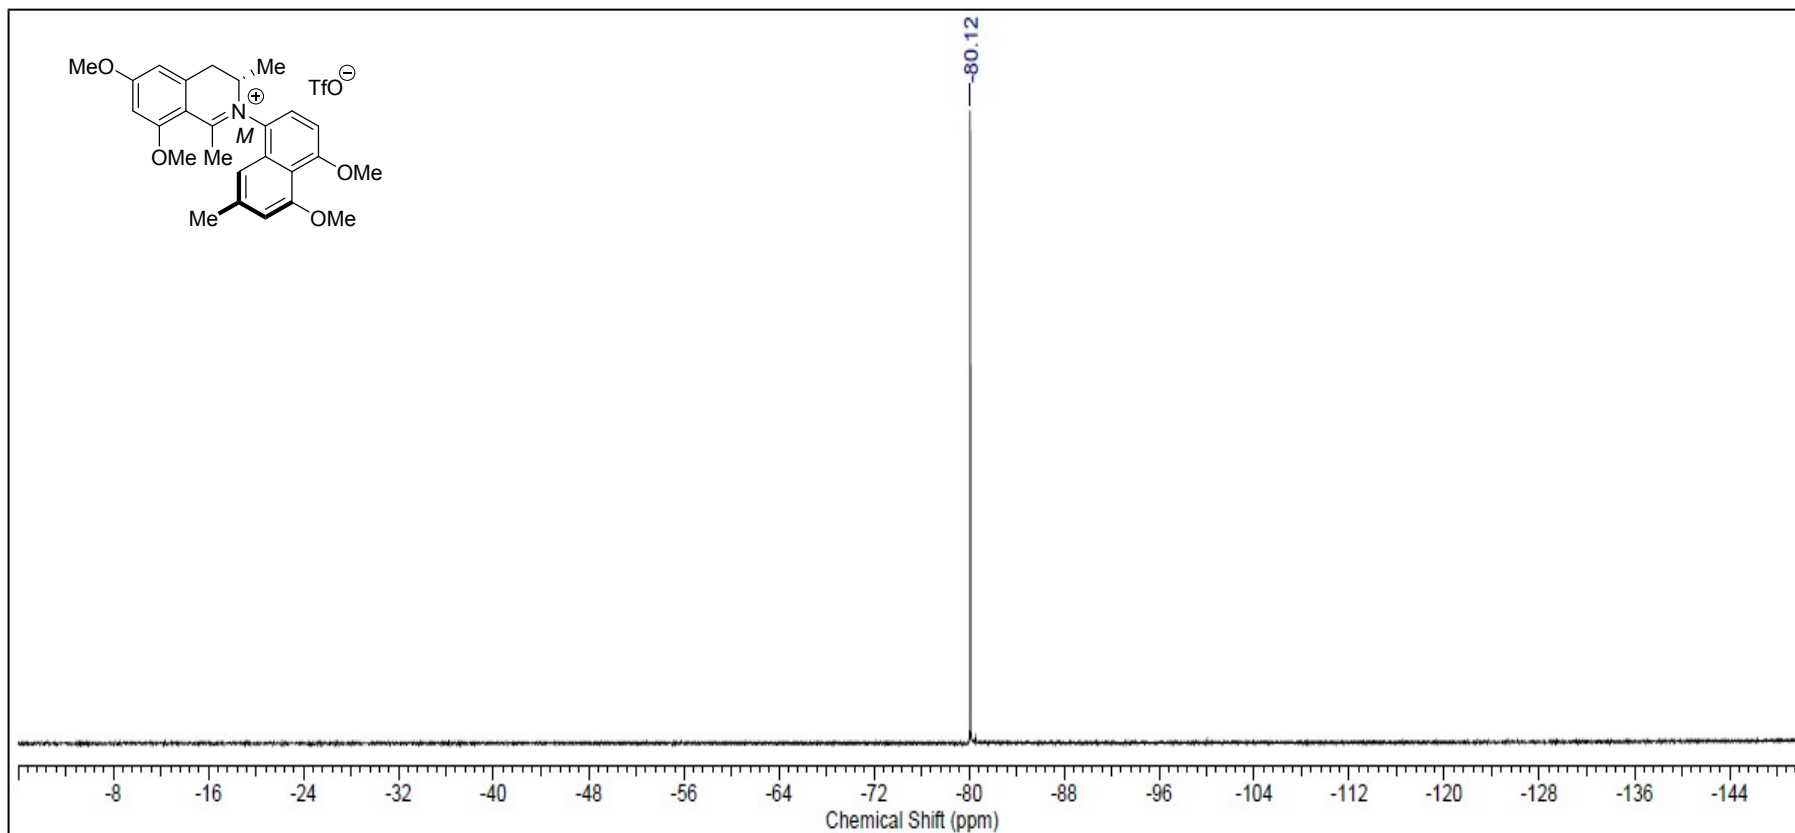

### 1-5. Spectroscopic Data of Atropodiastereomer (*P*-1)

a) <sup>1</sup>H NMR Spectrum of *P*-1 (solvent; CDCl<sub>3</sub>)

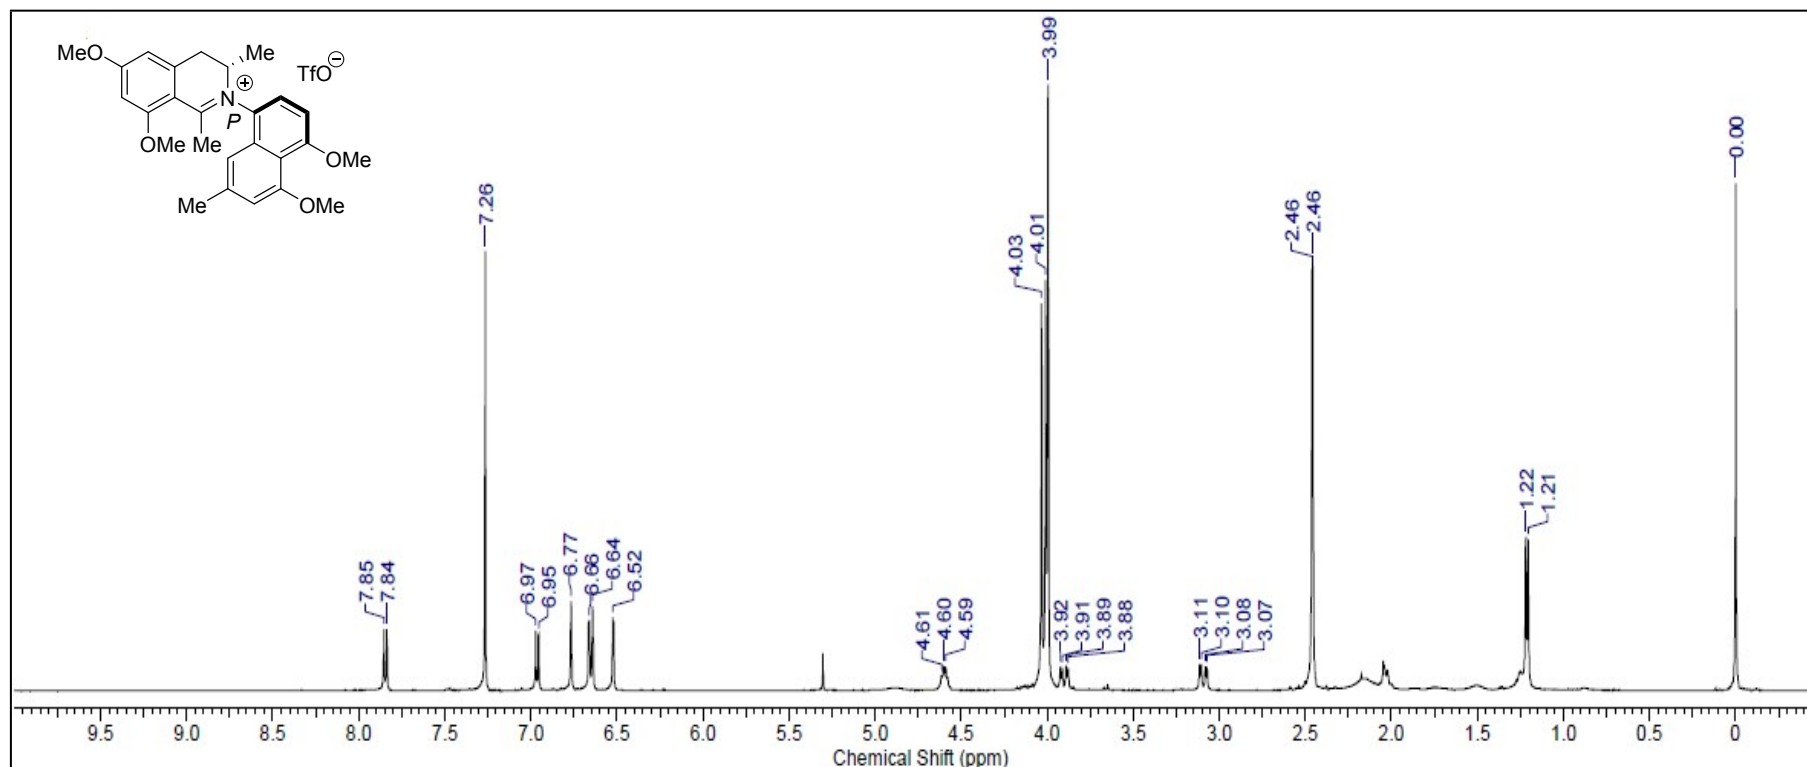

b) <sup>1</sup>H NMR Spectrum of *P*-1 (solvent; CD<sub>3</sub>OD)

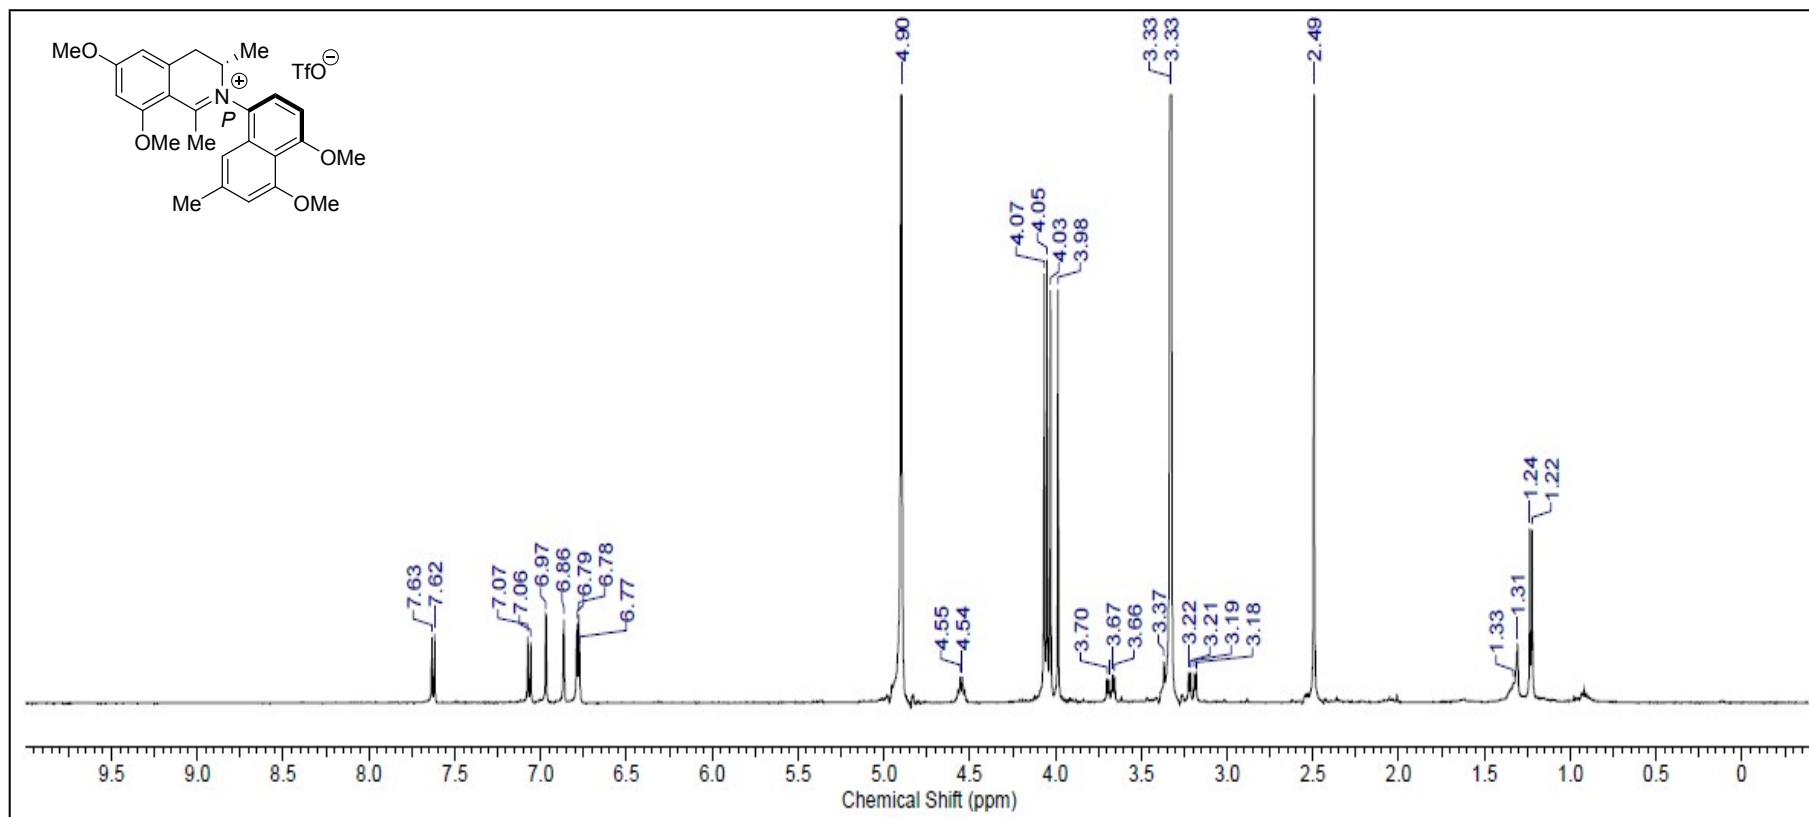



c) <sup>13</sup>C NMR Spectrum of *P*-1 (solvent; CDCl<sub>3</sub>)

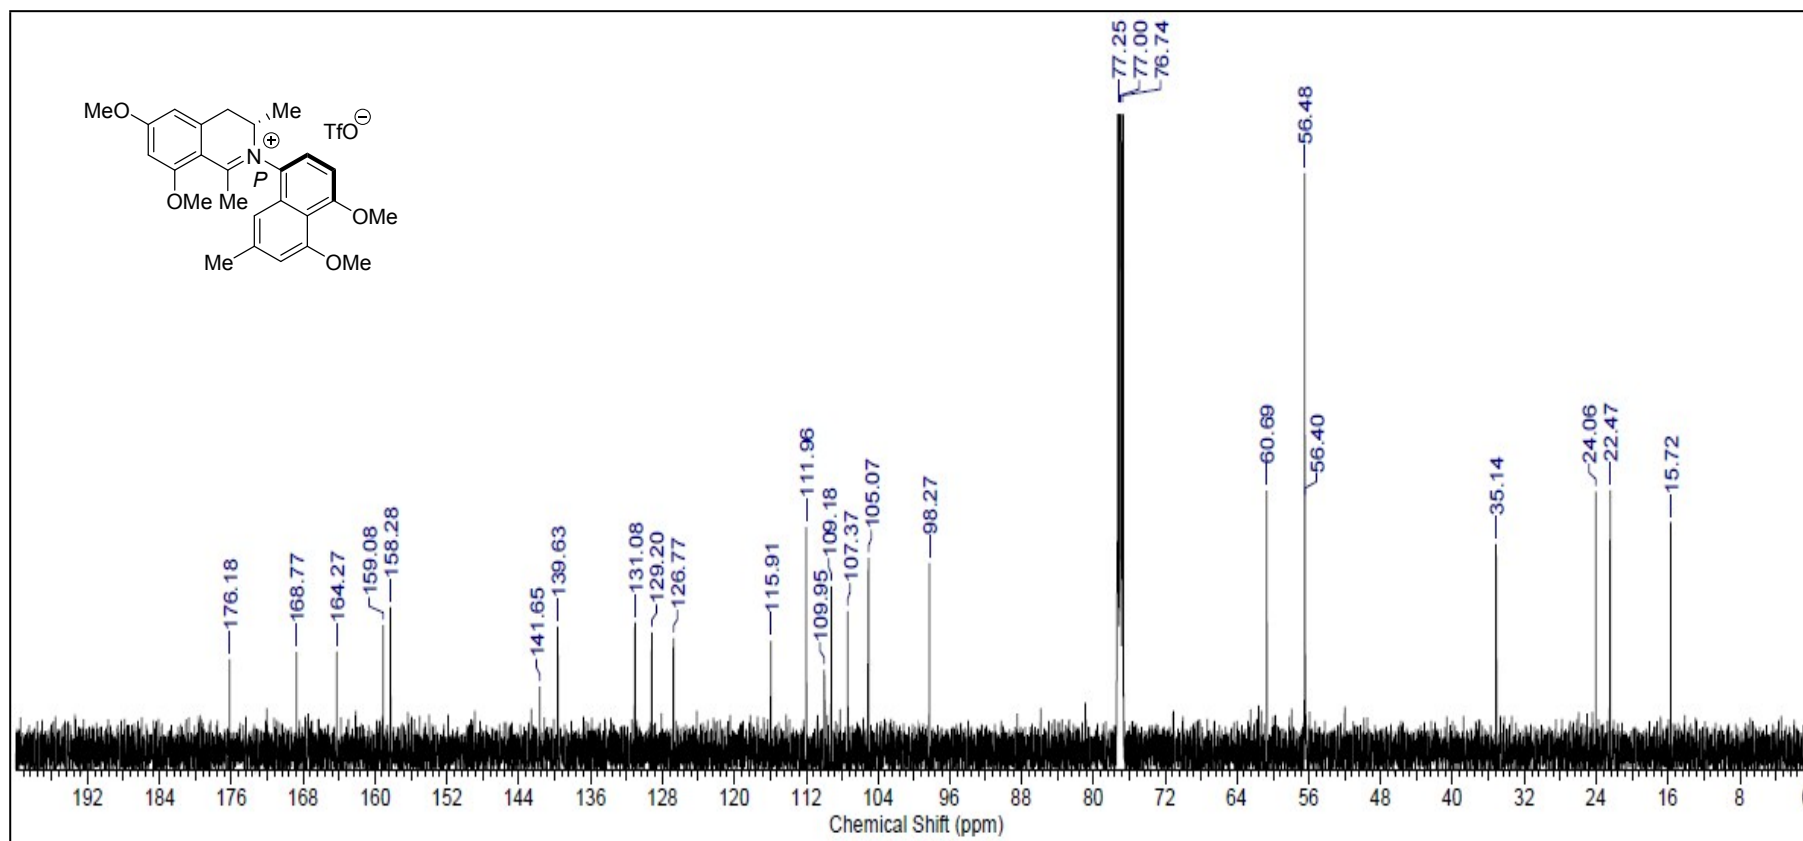

d)  $^{19}\text{F}$  NMR Spectrum of *P*-1 (solvent; MeOD)

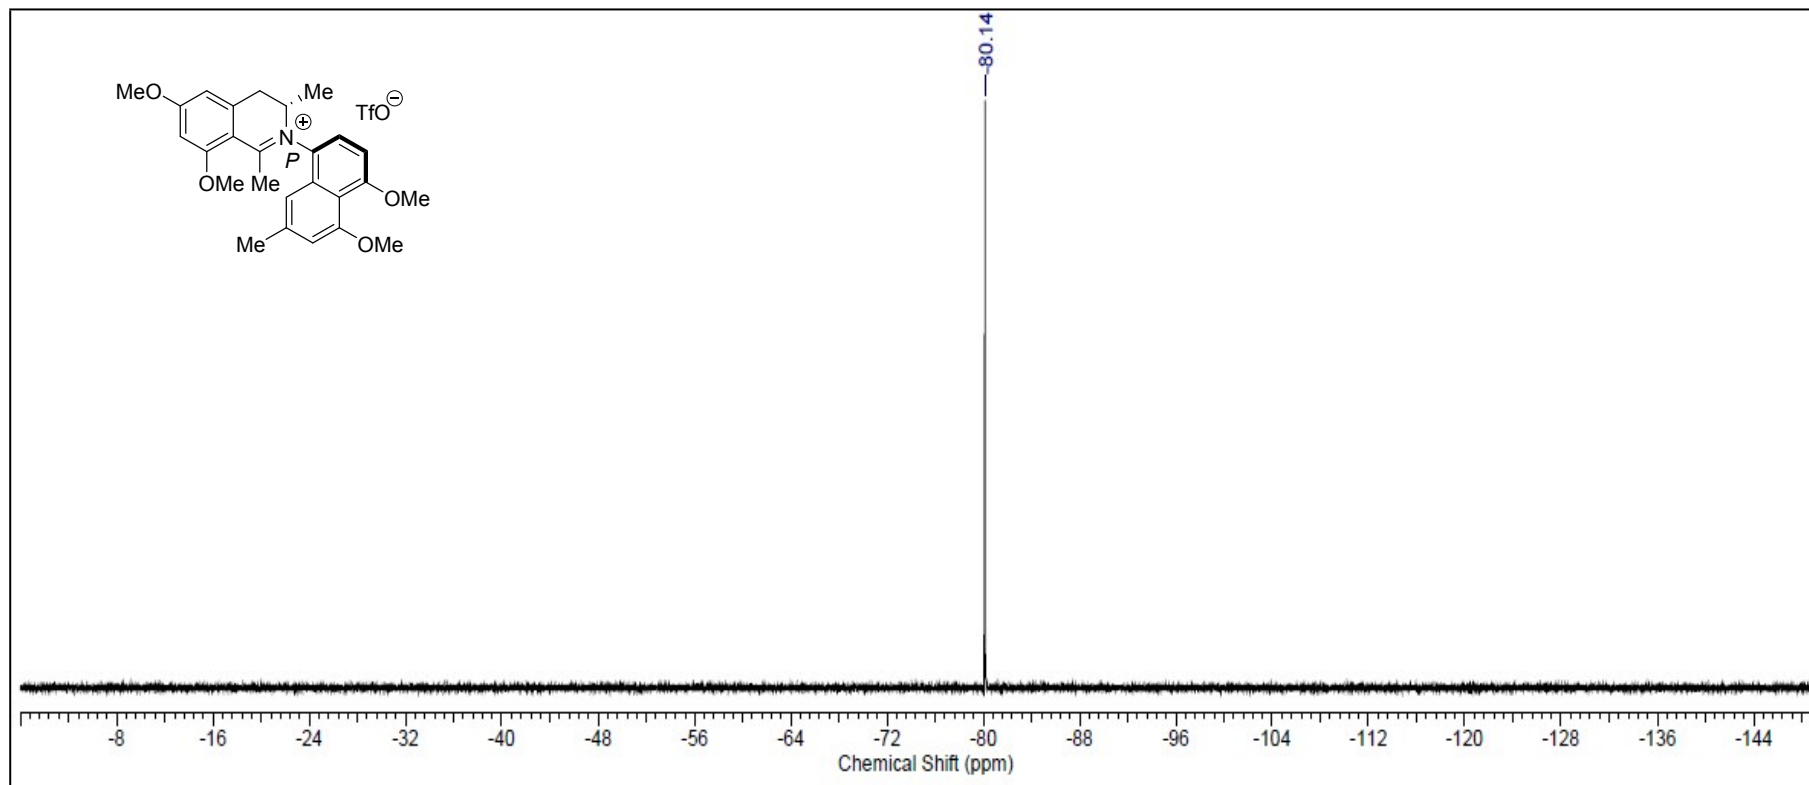

### 1-6. Comparison of NMR Spectra of Tertiary Amides (*M-2* and *P-2*)

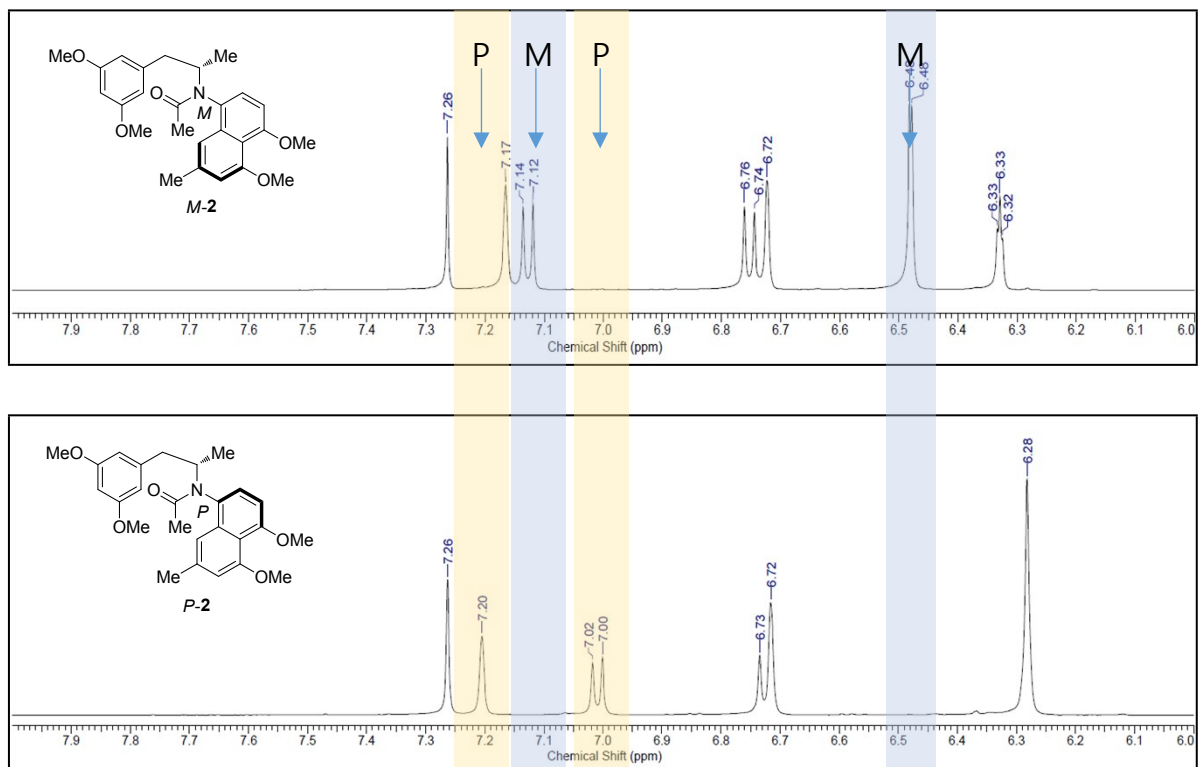

### 1-7. Comparison of NMR Spectra of Ancistrocladinium A (*M*-1) and Atropdiastereomer (*P*-1)

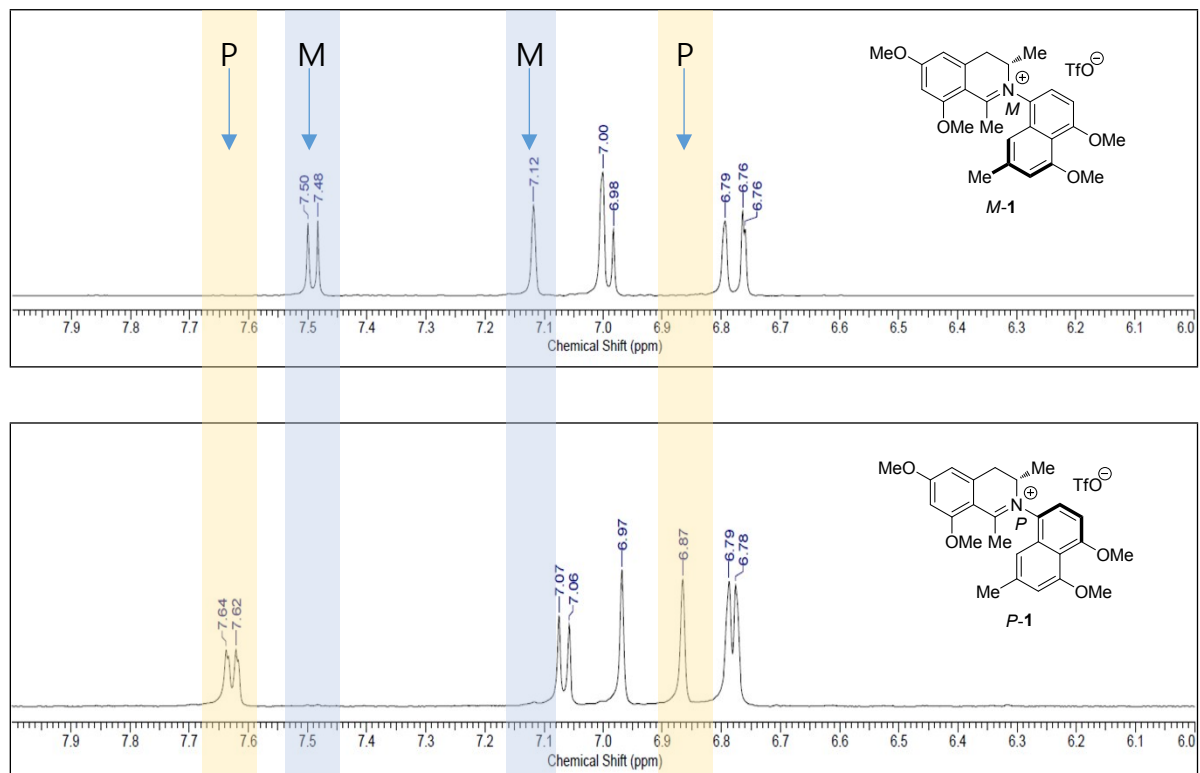

### 1-8. Comparison of $^{19}\text{F}$ NMR Spectra after Ion-exchange Chromatography

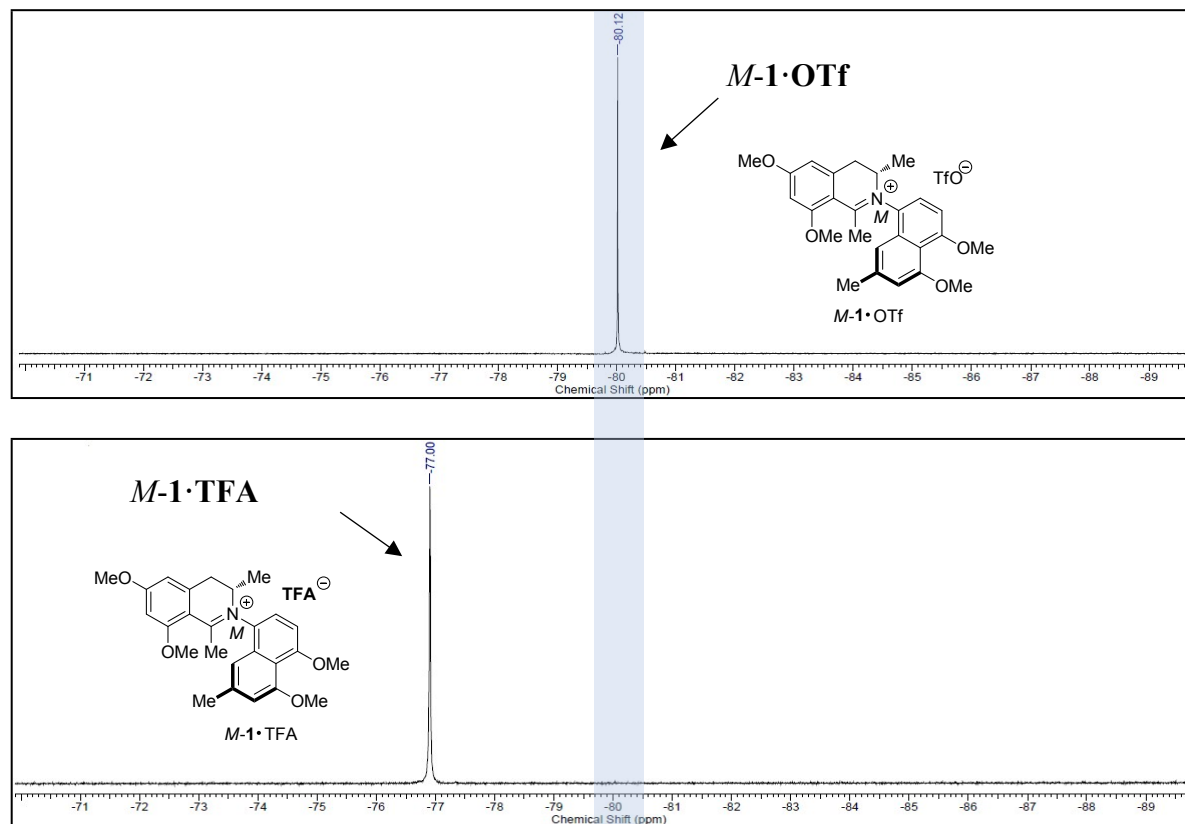

# 1-9. Comparison of NMR Spectra of Ancistrocladinium A (M-1) and Atropdiastereomer (P-1) between Our and Bringmann's Results

## A. Comparison of <sup>1</sup>H NMR Spectra (in CDCl<sub>3</sub>)

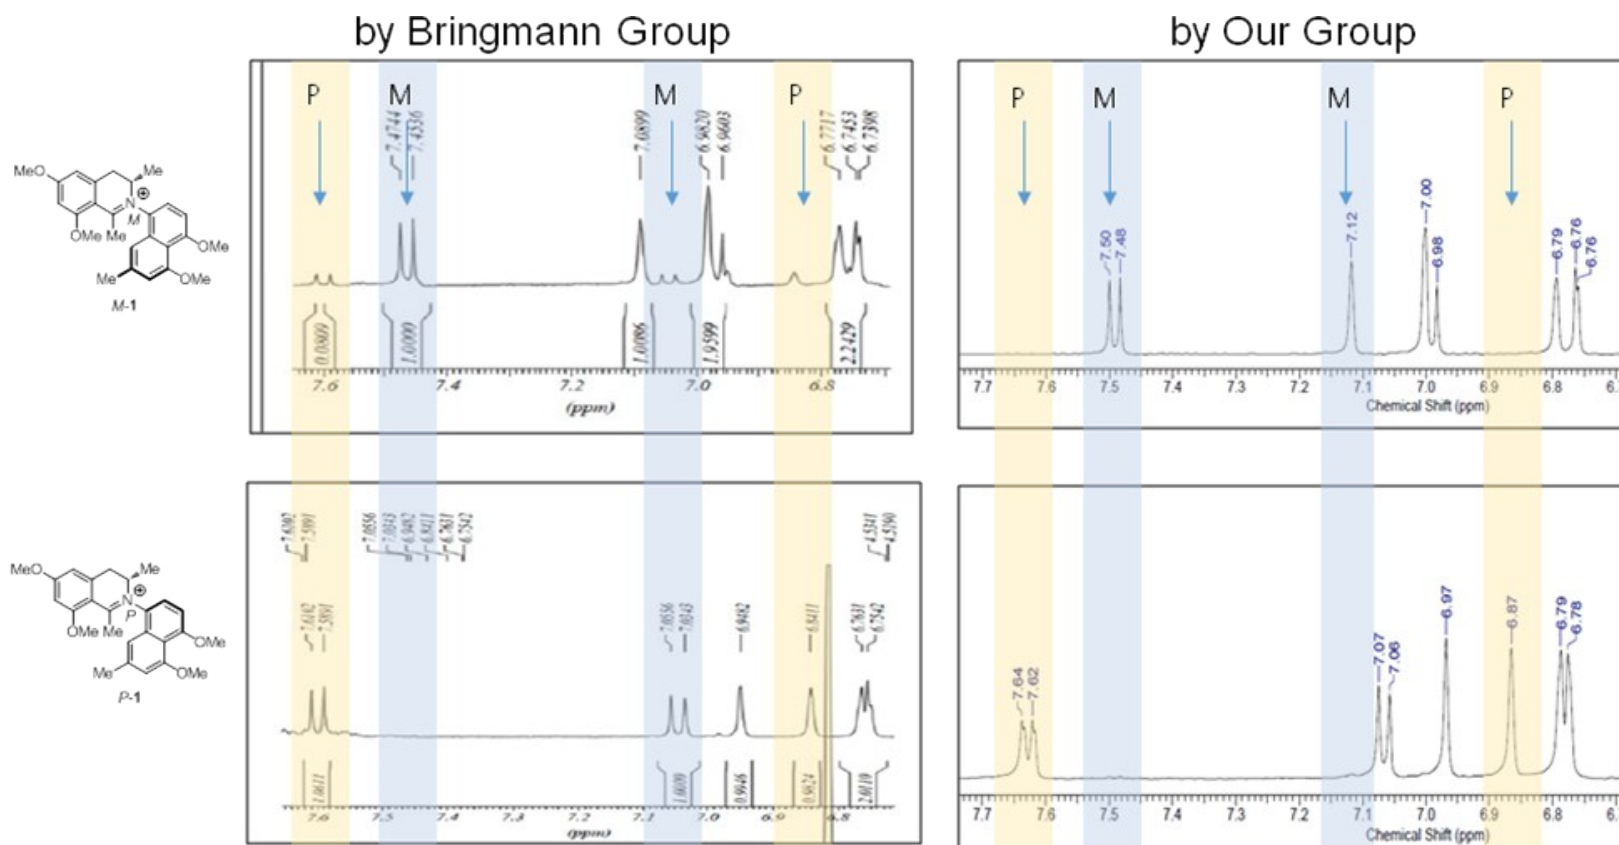

B. Comparison of  $^{13}\text{C}$  NMR Spectra of (*P*)-Ancistrocladinium A (**P-2**) (in  $\text{CDCl}_3$ )

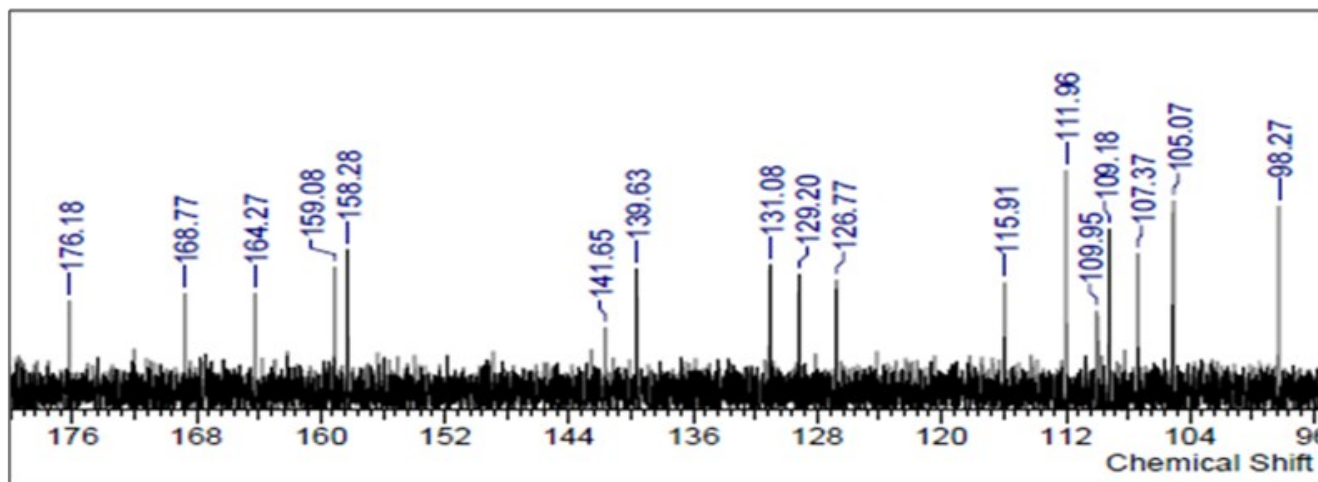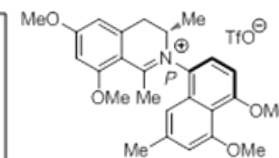

by Our Group

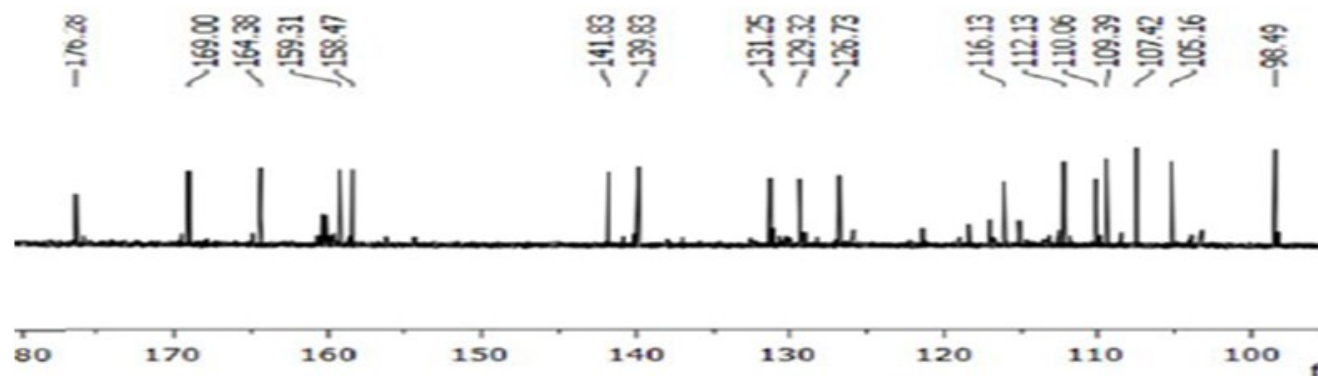

By Bringmann Group

Figure S8:  $^{13}\text{C}$  NMR spectrum of (*P*)-Ancistrocladinium A (**3b**) in  $\text{CDCl}_3$

C. Comparison of  $^{13}\text{C}$  NMR Spectra of (P)-Ancistrocladinium A (P-2) (in  $\text{CDCl}_3$ )

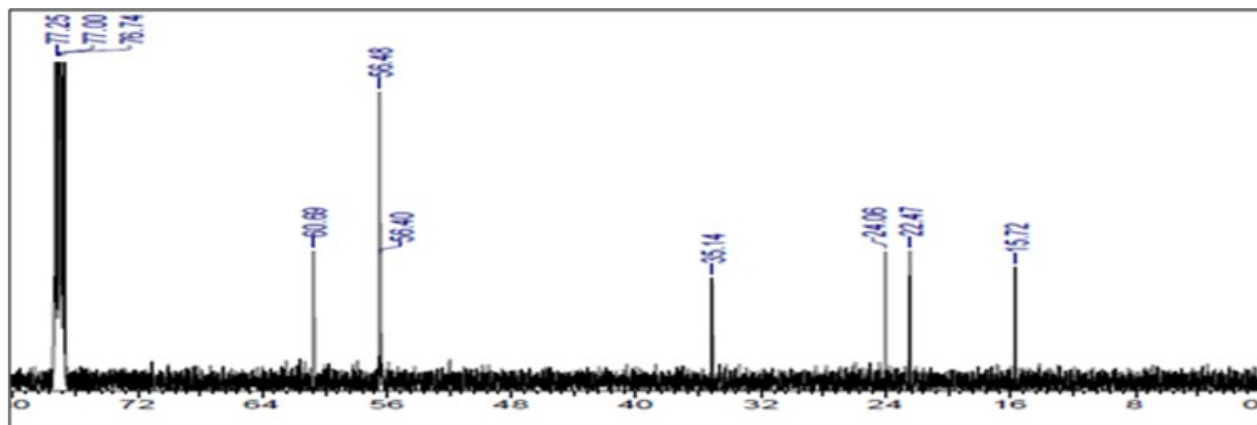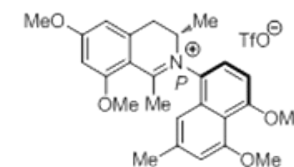

by Our Group

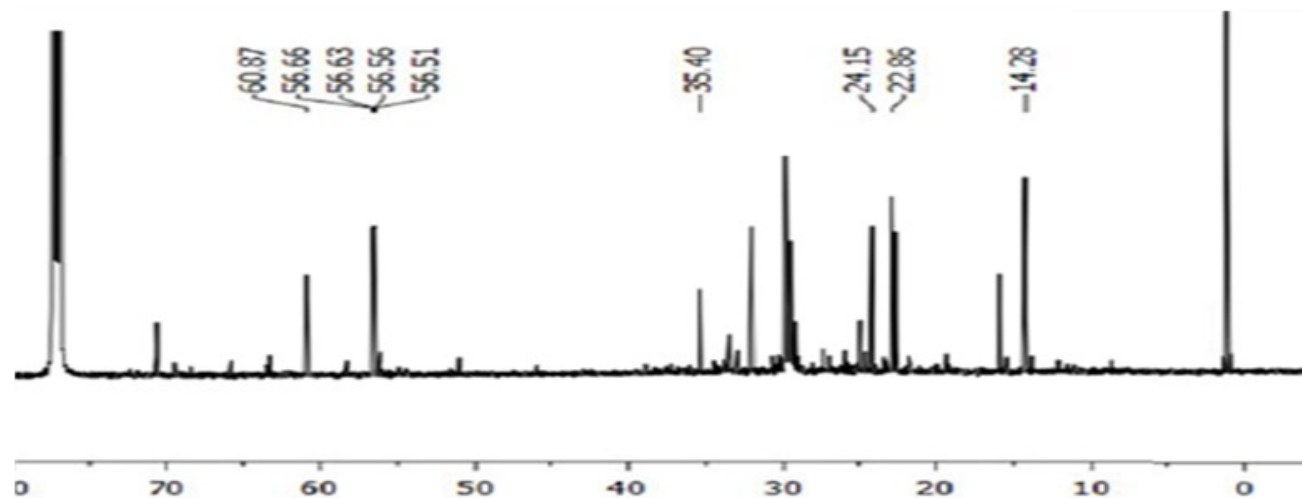

by Bringmann Group
